# Supplementary material for: External validation and update of a prognostic model to predict mortality in hospitalized adults with RSV: A retrospective Dutch cohort study
Source: PubMed Central journal article supplement (PMC6851775; doi:10.1002/jmv.25568), 2019-08-28

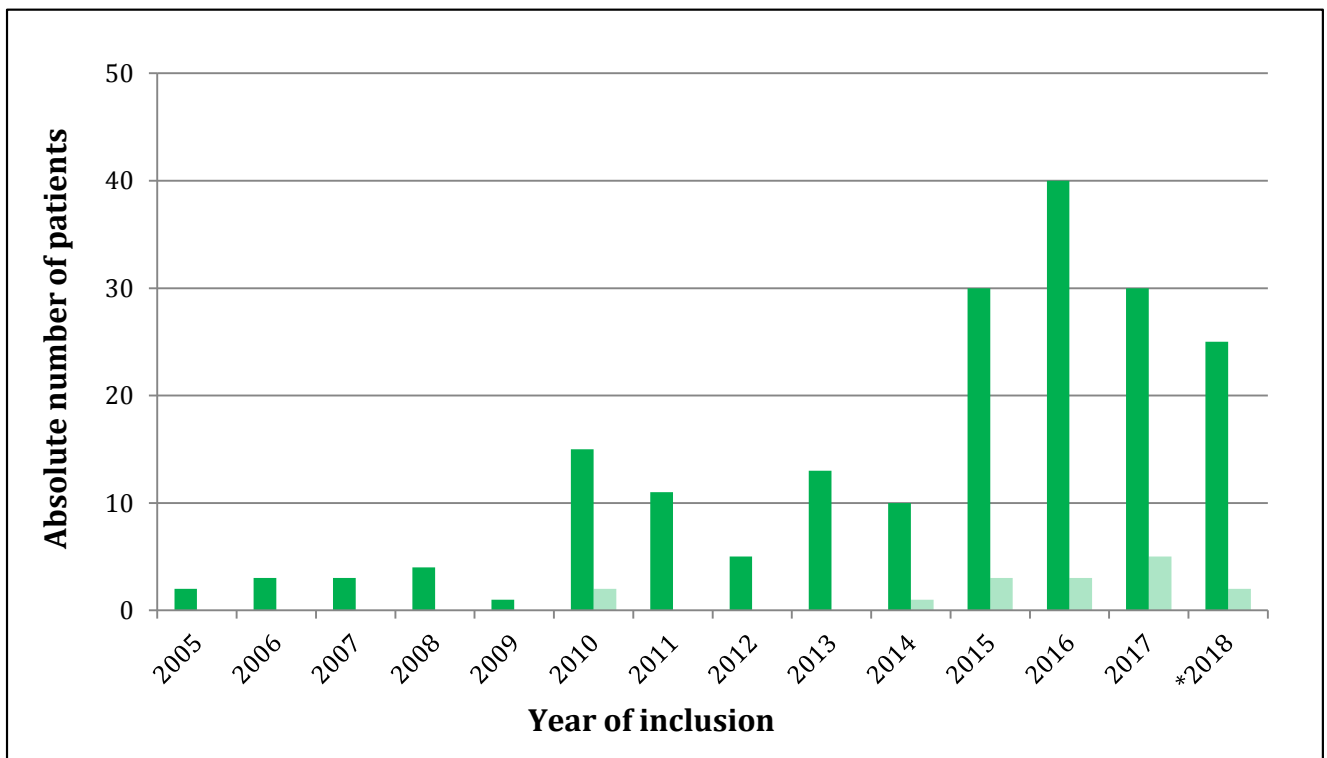

Supplement: JMV-91-2117-s001.pdf [file JMV-91-2117-s001.pdf]
