# Supplementary material for: External validation and update of a prognostic model to predict mortality in hospitalized adults with RSV: A retrospective Dutch cohort study
Source: PubMed Central journal article supplement (PMC6851775; doi:10.1002/jmv.25568), 2019-08-28

**Search [prognostic] models for [RSV] in [adults]<sup>a</sup>**

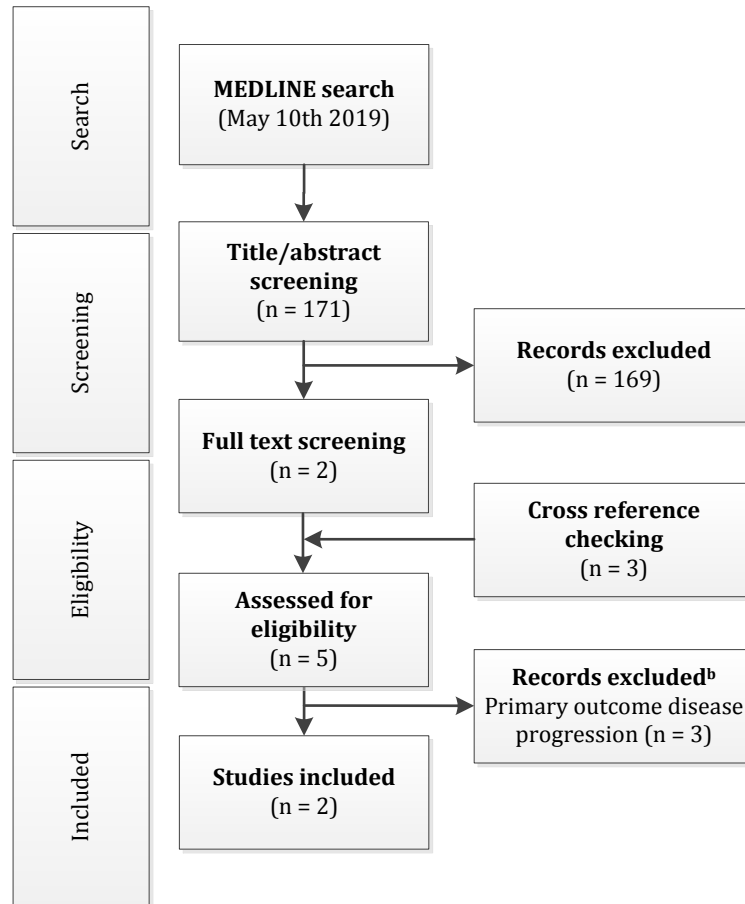

Supplement: JMV-91-2117-s002.pdf [file JMV-91-2117-s002.pdf]
